# Supplementary material
Source: Springer Nature journal article supplement (https://www.springermedizin.de/resource/supplementary/12903_2012_243_MOESM2_ESM.pdf/9516408)

Social  
structure

Social  
context

Individual  
level

Biological  
level

Socioeconomic  
status and  
healthcare  
services

Social  
capital

Psychological  
reactions

Demographic  
profile and  
health-  
related  
behavior

Dental  
caries

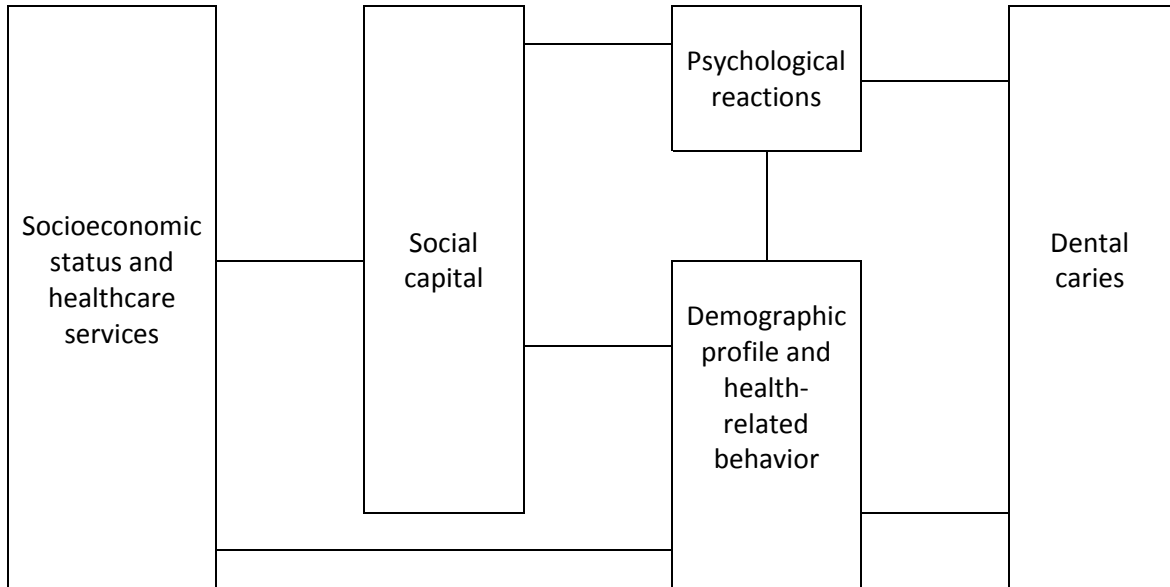

Supplement: MOESM2 [file 9516408]
